# Supplementary material
Source: Springer Nature journal article supplement (https://www.springermedizin.de/resource/supplementary/13024_2012_369_MOESM4_ESM.pdf/9643798)

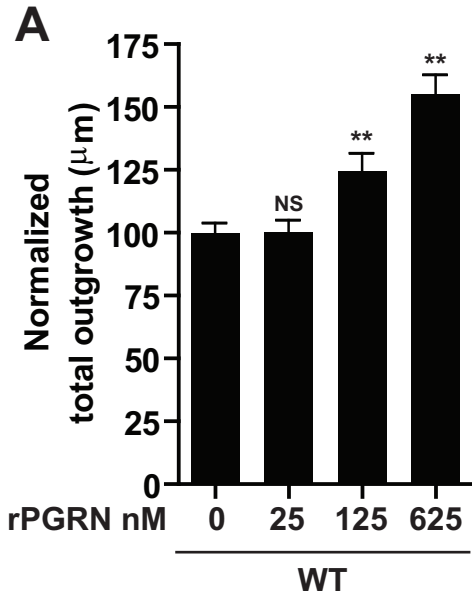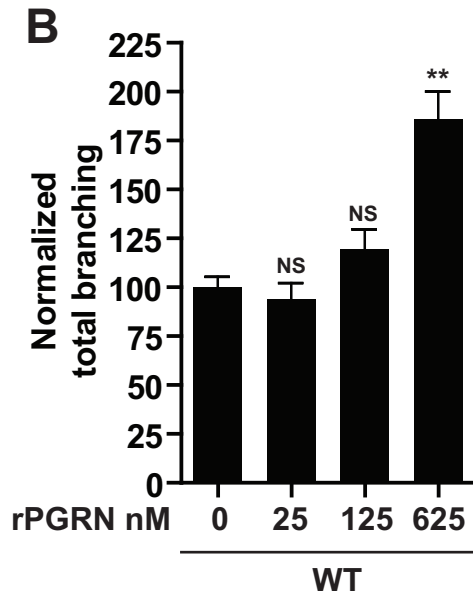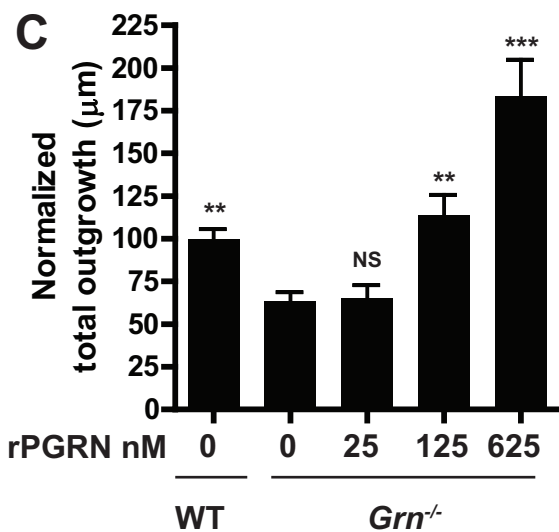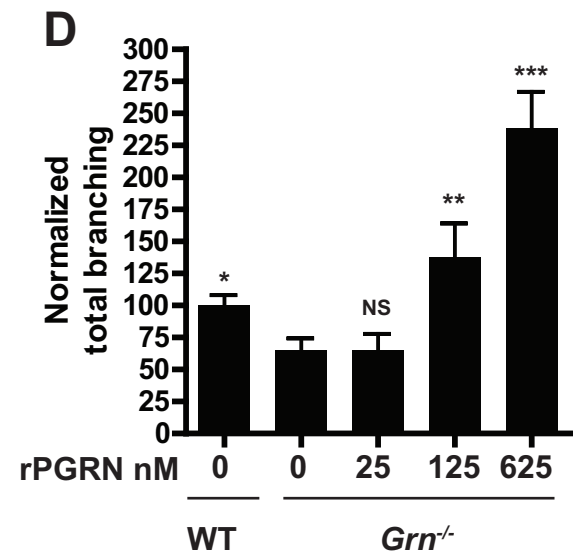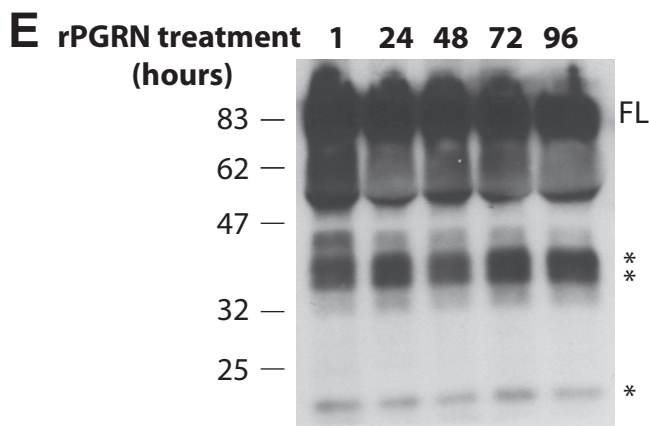

Supplement: MOESM4 [file 9643798]
